# Supplementary material
Source: Springer Nature journal article supplement (https://www.springermedizin.de/resource/supplementary/12911_2011_560_MOESM3_ESM.pdf/9525964)
Supplement: MOESM3 [file 9525964]

Build a new pedigree online

Upload a pre-existing pedigree

Review pedigree in data table and drawing

Compute BRCA1 and BRCA2 mutation carrier probabilities and breast/ovarian cancer risks

Download the input pedigree and results in plain text and PDF format

Delete all data files created during the session from the server

Logout
